# Supplementary material for: Tissue resident iNKT17 cells facilitate cancer cell extravasation in liver metastasis via interleukin-22
Source: PubMed Central journal article supplement — Immunity. 2023 Jan 10;56(1):125–142.e12. doi: 10.1016/j.immuni.2022.12.014 (PMC9839362; doi:10.1016/j.immuni.2022.12.014), 2023-01-10
Supplement: mmc1.pdf [file mmc1.pdf]

## Supplemental information

### Tissue resident iNKT17 cells

### facilitate cancer cell extravasation

### in liver metastasis via interleukin-22

Anastasios D. Giannou, Jan Kempfski, Ahmad Mustafa Shiri, Jöran Lücke, Tao Zhang, Lilan Zhao, Dimitra E. Zazara, Filippo Cortesi, Kristoffer Riecken, Maria Carolina Amezcua Vesely, Jun Siong Low, Hao Xu, Eleanna Kaffe, Laura Garcia-Perez, Theodora Agaloti, Yoshito Yamada, Wolfgang Jungraithmayr, Ehud Zigmond, Karl-Frederick Karstens, Babett Steglich, Jonas Wagner, Leonie Konczalla, Antonella Carambia, Kornelius Schulze, Johann von Felden, Peter May, Daria Briukhovetska, Tanja Bedke, Leonie Brockmann, Sarah Starzonek, Tobias Lange, Claudia Koch, Sabine Riethdorf, Penelope Pelczar, Marius Böttcher, Morsal Sabihi, Francis J. Huber, Matthias Reeh, Julia Kristin Grass, Ramez Wahib, Hannes Seese, Björn-Ole Stüben, Mohammad Fard-Aghaie, Anna Duprée, Pasquale Scognamiglio, Gabriel Plitzko, Jan Meiners, Shiwa Soukou, Agnes Wittek, Caroline Manthey, Ioannis C. Maroulis, Petra C. Arck, Daniel Perez, Bin Gao, Sotirios G. Zarogiannis, Till Strowig, Renata Pasqualini, Wadih Arap, Javier Suárez Gosálvez, Sebastian Kobold, Immo Prinz, Andreas H. Guse, Michael Tachezy, Tarik Ghadban, Asmus Heumann, Jun Li, Nathaniel Melling, Oliver Mann, Jakob R. Izbicki, Klaus Pantel, Udo Schumacher, Ansgar W. Lohse, Richard A. Flavell, Nicola Gagliani, and Samuel Huber

## SUPPLEMENTAL INFORMATION

**Tissue resident iNKT17 cells facilitate cancer cell extravasation in liver metastasis via IL-22**

**Anastasios D. Giannou, Jan Kempfski, Ahmad Mustafa Shiri, Jöran Lücke, Tao Zhang, Lilan Zhao, Dimitra E. Zazara, Filippo Cortesi, Kristoffer Riecken, Maria Carolina Amezcua Vesely, Jun Siong Low, Hao Xu, Eleanna Kaffe, Laura Garcia-Perez, Theodora Agaloti, Yoshito Yamada, Wolfgang Jungraithmayr, Ehud Zigmond, Karl-Frederick Karstens, Babett Steglich, Jonas Wagner, Leonie Konczalla, Antonella Carambia, Kornelius Schulze, Johann von Felden, Peter May, Daria Briukhovetska, Tanja Bedke, Leonie Brockmann, Sarah Starzonek, Tobias Lange, Claudia Koch, Sabine Riethdorf, Penelope Pelczar, Marius Böttcher, Morsal Sabihi, Francis J. Huber, Matthias Reeh, Julia Kristin Graß, Ramez Wahib, Hannes Seese, Ole Stüben, Mohammad Fard-Aghaie, Anna Duprée, Pasquale Scognamiglio, Gabriel Plitzko, Jan Meiners, Shiwa Soukou, Agnes Wittek, Caroline Manthey, Ioannis C. Maroulis, Petra C. Arck, Daniel Perez, Bin Gao, Sotirios G. Zarogiannis, Till Strowig, Renata Pasqualini, Wadih Arap, Javier Suárez Gosálvez, Sebastian Kobold, Immo Prinz, Andreas H. Guse, Michael Tachezy, Tarik Ghadban, Asmus Heumann, Jun Li, Nathaniel Melling, Oliver Mann, Jakob R. Izbicki, Klaus Pantel, Udo Schumacher, Ansgar W. Lohse, Richard A. Flavell, Nicola Gagliani, and Samuel Huber**

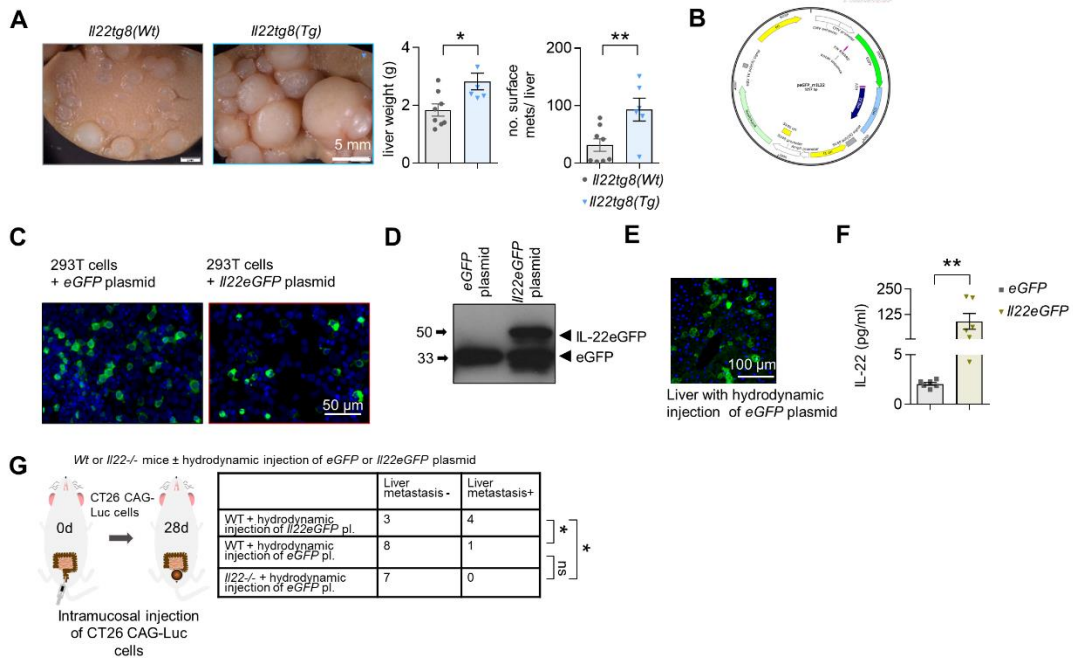

**Figure S1, related to Figure 1. High IL-22 levels promote liver metastasis**

(A) Representative pictures, liver weight and number of macroscopic metastases in total liver of mice with normal (*Il22tg8<sup>(Wt)</sup>*) or high (*Il22tg8<sup>(Tg)</sup>*) levels of IL-22.  $n \geq 5$  mice per group. Scale bar: 5 mm. (B) Map of *Il22eGFP* plasmid. (C) *In vitro* cultured 293T cells transfected with *eGFP* (left) and *Il22eGFP* (right) plasmid. Scale bar: 50 $\mu$ m. (D) 293T cells were transfected with *peGFP* and *pIl22eGFP* plasmid. GFP levels were measured using immunoblotting. (E) Representative picture of liver tissue upon hydrodynamic injection of *peGFP* plasmid. Scale bar: 100 $\mu$ m. (F) IL-22 serum levels in mice hydrodynamically injected with *eGFP* or *Il22eGFP* plasmid.  $n \geq 6$  mice per group. (G) Schematic overview and incidence of liver metastases in mice with no (*Il22*<sup>-/-</sup> mice upon hydrodynamic injection of *eGFP* plasmid), normal (WT upon hydrodynamic injection of *eGFP* plasmid) or high (WT upon hydrodynamic injection of *Il22eGFP* plasmid) levels of IL-22 using hydrodynamic overexpression of *eGFP* or *Il22eGFP* plasmid and intramucosal injection of CT26 CAG-Luc cells.  $n \geq 7$  mice per group. Data presented as mean  $\pm$  SEM. ns>0.05; \*:p<0.05; \*\*:p $\leq$ 0.01; \*\*\*:p $\leq$ 0.001 as assessed by Mann-Whitney U test (A, F) or Fischer's exact test (G).

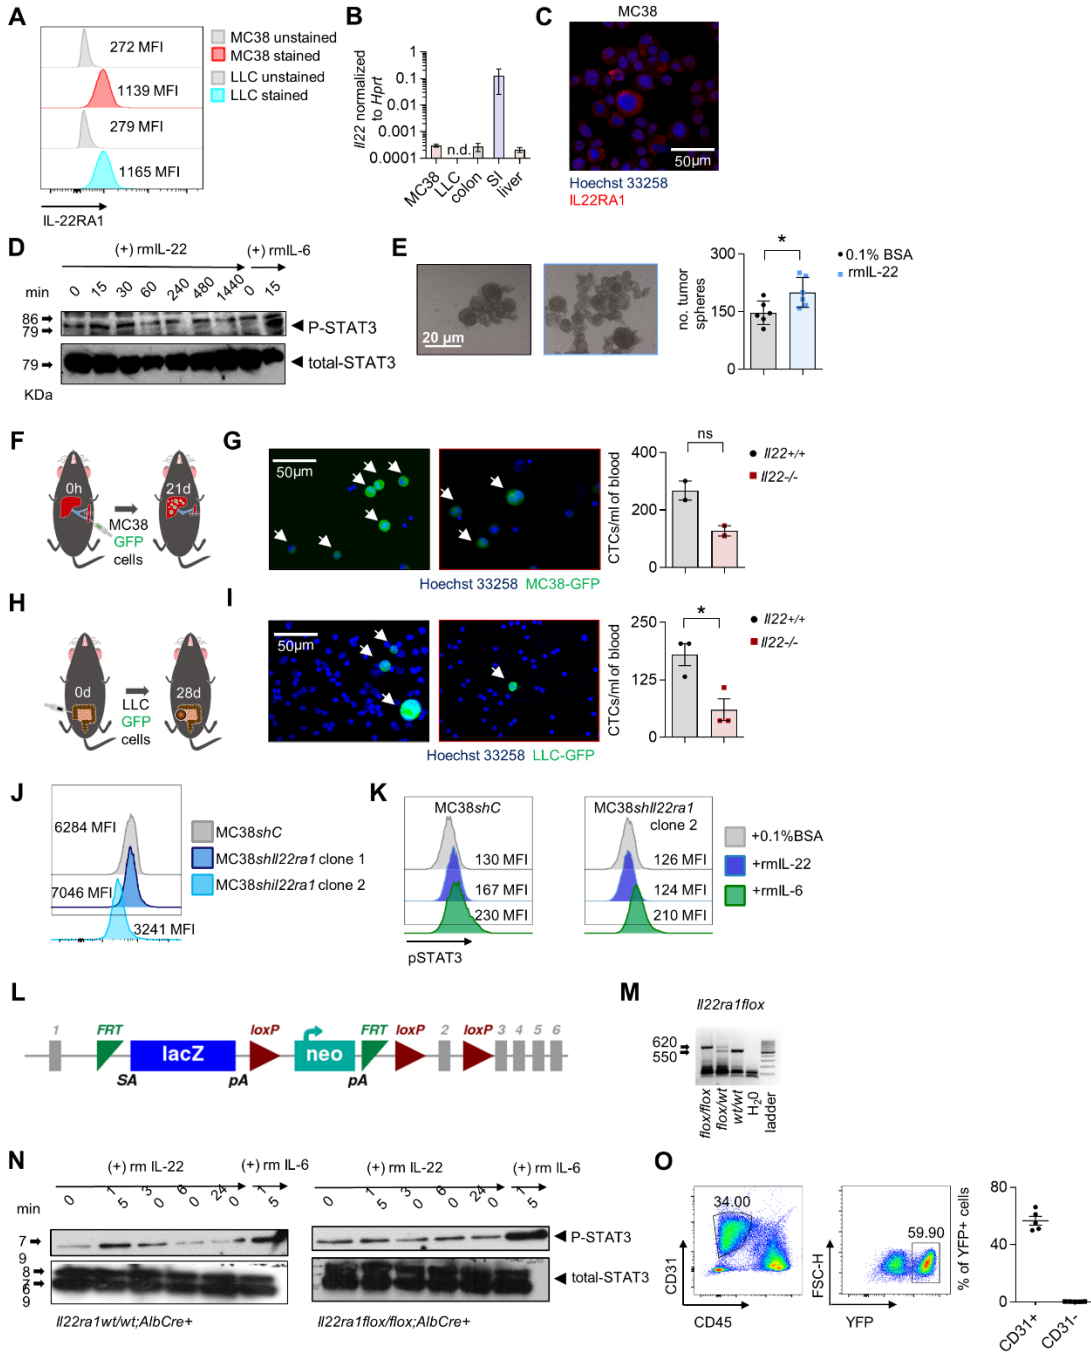

## Figure S2, related to Figure 2. IL-22 signaling increases cancer cell stemness

(A) IL-22RA1 surface protein levels in MC38 and LLC cancer cells measured using FACS (B) *Il22* mRNA levels in MC38, LLC cancer cells as well as murine colon, small intestine (SI) and liver (RNA extracts from total tissue). (C) Immunostaining of IL-22RA1 in MC38 cells. Scale bar: 50µm. (D) Immunoblotting of p-STAT3 on MC38 cells upon IL-22 exposure in different time points. (E) Representative pictures and number of tumor spheres after exposure to 0.1% BSA or rmlL-22. Scale bar: 20 µm. (F) Schematic overview of intrasplenic injection of MC38 GFP-labelled cells for forced liver metastasis induction. (G) Representative pictures and number of GFP-labelled CTCs in *Il22*<sup>+/+</sup> and *Il22*<sup>-/-</sup> mice. n=2 independent experiments with 5 mice per group each time. Scale bar: 50 µm. (H) Schematic overview of cecum injection of LLC-GFP cells for spontaneous liver metastasis induction in *Il22*<sup>+/+</sup> and *Il22*<sup>-/-</sup> mice (I) Representative pictures and number of GFP-labelled CTCs in *Il22*<sup>+/+</sup> and *Il22*<sup>-/-</sup> mice. n=3 independent experiments with 6 mice per group each time. Scale bar: 50 µm. (J) Validation of silencing of *Il22ra1* in MC38 cancer cells by FACS. (K) Functional assay of silencing of *Il22ra1* in MC38 cancer cells by analyzing the pSTAT3 levels upon IL-22 exposure. (L) Construct map of *Il22ra1*<sup>flox/flox</sup> mice. (M) Genotyping PCR of *Il22ra1*<sup>-/-</sup> and *Il22ra1*<sup>flox/flox</sup> mice. (N) Hepatocytes were isolated from *Il22ra1*<sup>wt/wt</sup>;*Alb*<sup>Cre+</sup> and *Il22ra1*<sup>flox/flox</sup>;*Alb*<sup>Cre+</sup> mice and treated with 50 ng/ml recombinant murine (rm) IL-22 for 15 min, 30 min, 60 min and 240 min. IL-6 was used as a positive control. pSTAT3 levels were measured using immunoblotting. n=2 mice per group. (O) Gating strategy for identification of YFP+ LSECs isolated from liver of *Il22ra1*<sup>flox/flox</sup>;*Cdh5*<sup>Cre+</sup> mice and respective quantification. Data presented as mean ± SEM. ns:p>0.05; \*:p<0.05; \*\*:p≤0.01; \*\*\*:p≤0.001 as assessed by Mann-Whitney U test (E, G).

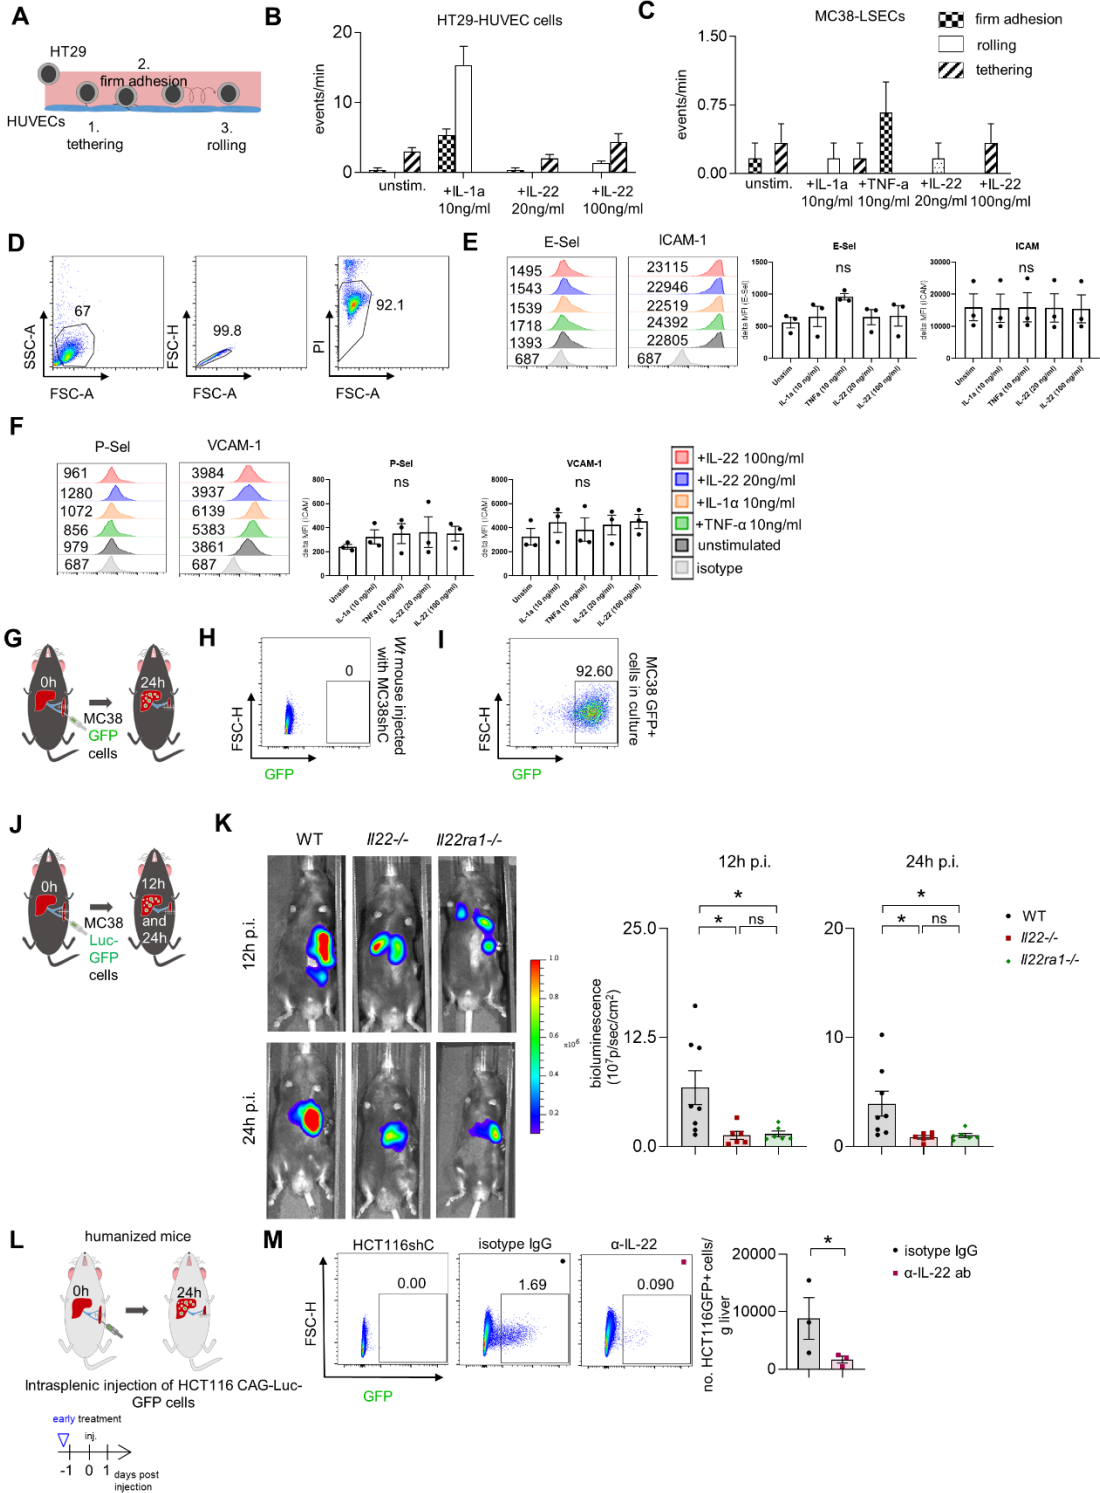

**Figure S3, related to Figure 3. IL-22 does not affect cancer cell endothelial adhesion, but cancer cell extravasation**

(A) Schematic overview of the *in vitro* adhesion assay of endothelial HUVEC and HT-29 cancer cells. (B) HT-29 cancer cells were perfused over HUVEC cells (flow rate 8 mL/h) and retaining cells were counted. (C) MC38 cancer cells were perfused over LSECs (flow rate 8 mL/h) and retaining cells were counted. (D-F) FACS plots and histograms showing the expression of adhesion molecules, namely E-Selectin, P-Selectin, ICAM-1, VCAM-1, on LSECs upon stimulation with TNF- $\alpha$ , IL-1 $\alpha$  and IL-22 in two different concentrations. (G) Schematic overview of intrasplenic injection of MC38 GFP-labelled cells in WT mice (extravasation assay). (H) FACS plot of liver of Wt mouse after intrasplenic injection of MC38 shC cells (I) FACS plot of MC38 GFP-labelled cells in culture. (J) Schematic overview of intrasplenic injection of MC38 Luc-GFP-labelled cells in WT, *Il22*<sup>-/-</sup> and *Il22ra1*<sup>-/-</sup> mice (extravasation assay). (K) Bioluminescent imaging and quantification of bioluminescent signal of WT, *Il22*<sup>-/-</sup> and *Il22ra1*<sup>-/-</sup> mice 12 and 24 hours after intrasplenic injection of MC38 Luc-GFP cells. Bioluminescent scale: 1x10<sup>5</sup>-1x10<sup>6</sup> photons/sec/cm<sup>2</sup>/sr. (L) Injection of HCT116 CAG-Luc-GFP-labelled cells in humanized mice receiving a treatment with Fezakinumab (a human  $\alpha$ -IL-22 antibody) or IgG control antibody. (M) Representative FACS plots showing the percentage of extravasated GFP+ cancer cells in the liver and bar plots showing the total number of extravasated cancer cells from (L). Data presented as mean  $\pm$  SEM. ns>0.05; \*:p<0.05; \*\*:p<0.01 as assessed by one-way ANOVA with Bonferroni post hoc tests (B, C, E, F and K) or Mann-Whitney U test (M).



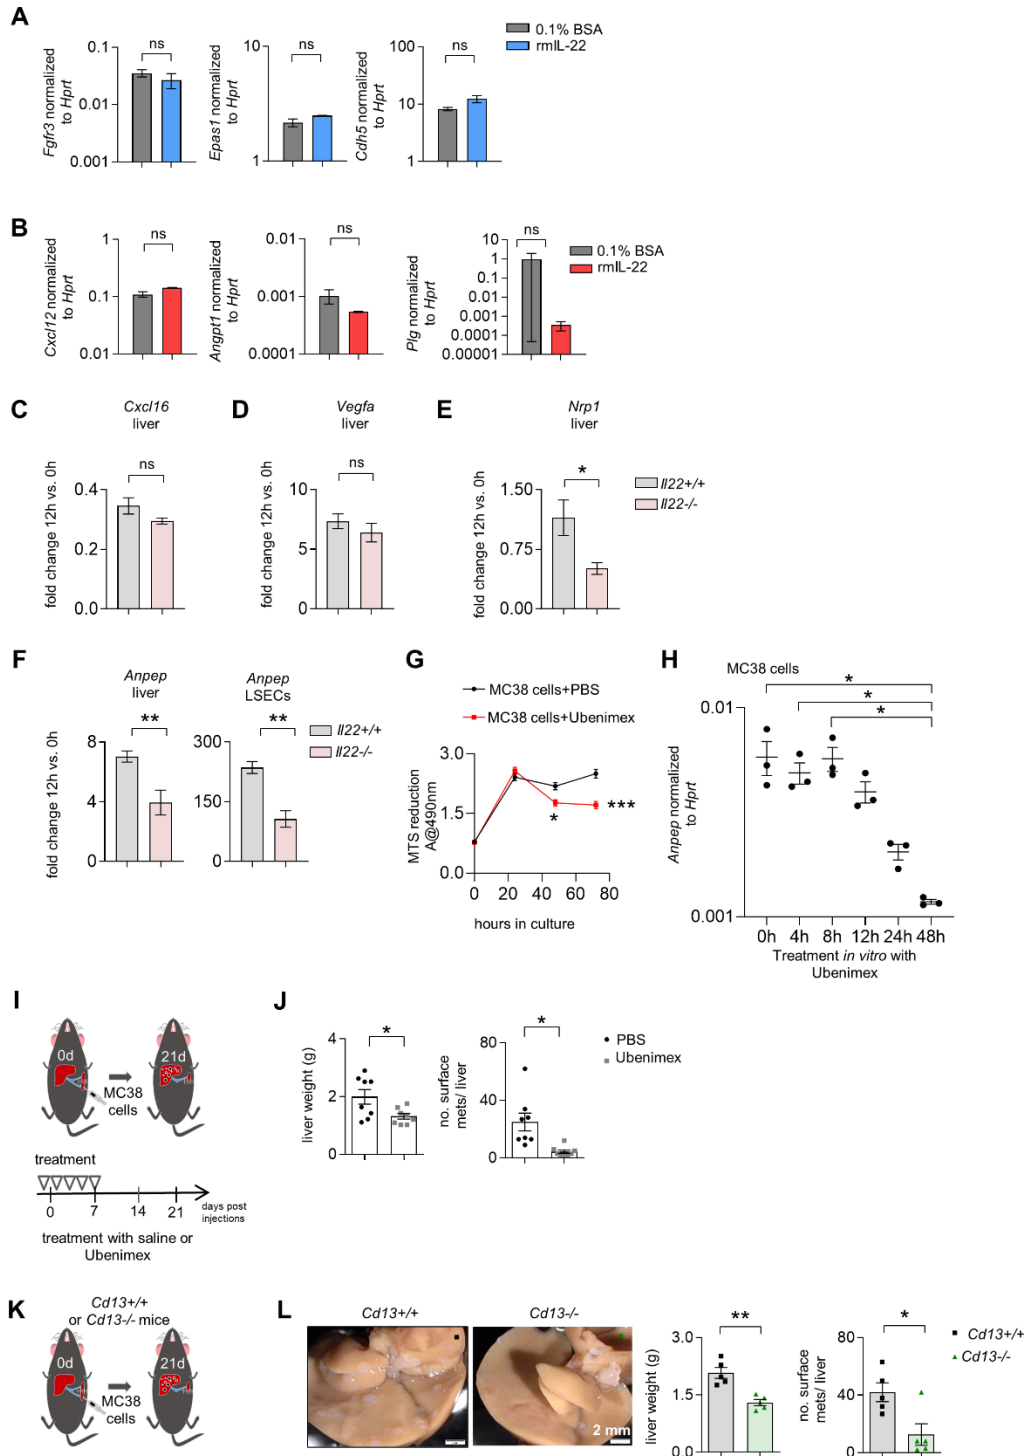

**Figure S4, related to Figure 4. Inhibition of aminopeptidases reduces liver metastasis formation**

(A) *Fgfr3*, *Epas1* and *Cdh5* expression in LSECs upon stimulation with rmlL-22. (B) *Cxcl12*, *Angpt1*, and *Plg* expression in LSECs upon stimulation with rmlL-22. (C, D, E) Fold change of *Cxcl16*, *Vegfa* and *Nrp1* expression in the liver tissue 12h post intrasplenic injection of MC38 cells in *Il22<sup>+/+</sup>* and *Il22<sup>-/-</sup>* mice compared to 0h. (F) Fold change of *Anpep* expression in LSECs and liver tissue 12h post intrasplenic injection of MC38 cells in WT and *Il22<sup>-/-</sup>* mice (G) MTS assay of MC38 cells upon Ubenimex treatment in different time points of culture. (H) *Anpep* expression of MC38 cells upon Ubenimex treatment in different time points of culture. (I) Schematic overview of intrasplenic injection of MC38 cells for forced liver metastasis induction in mice receiving a control or Ubenimex treatment, respectively. (J) Liver weight and number of macroscopic metastases in total liver of mice treated with PBS or Ubenimex. n ≥ 8 mice per group. (K) Schematic overview of intrasplenic injection of MC38 cells for forced liver metastasis induction in *Cd13<sup>+/+</sup>* and *Cd13<sup>-/-</sup>* mice. (L) Representative pictures, number of macroscopic metastases in total liver and liver weight of *Cd13<sup>+/+</sup>* mice compared to *Cd13<sup>-/-</sup>* mice. n = 5 mice per group. Data presented as mean ± SEM. ns>0.05; \*:p<0.05; \*\*:p≤0.01 as assessed by one-way (H, K, L) or two-way ANOVA with Bonferroni post hoc tests (G) or Mann-Whitney U test (A-F, J).

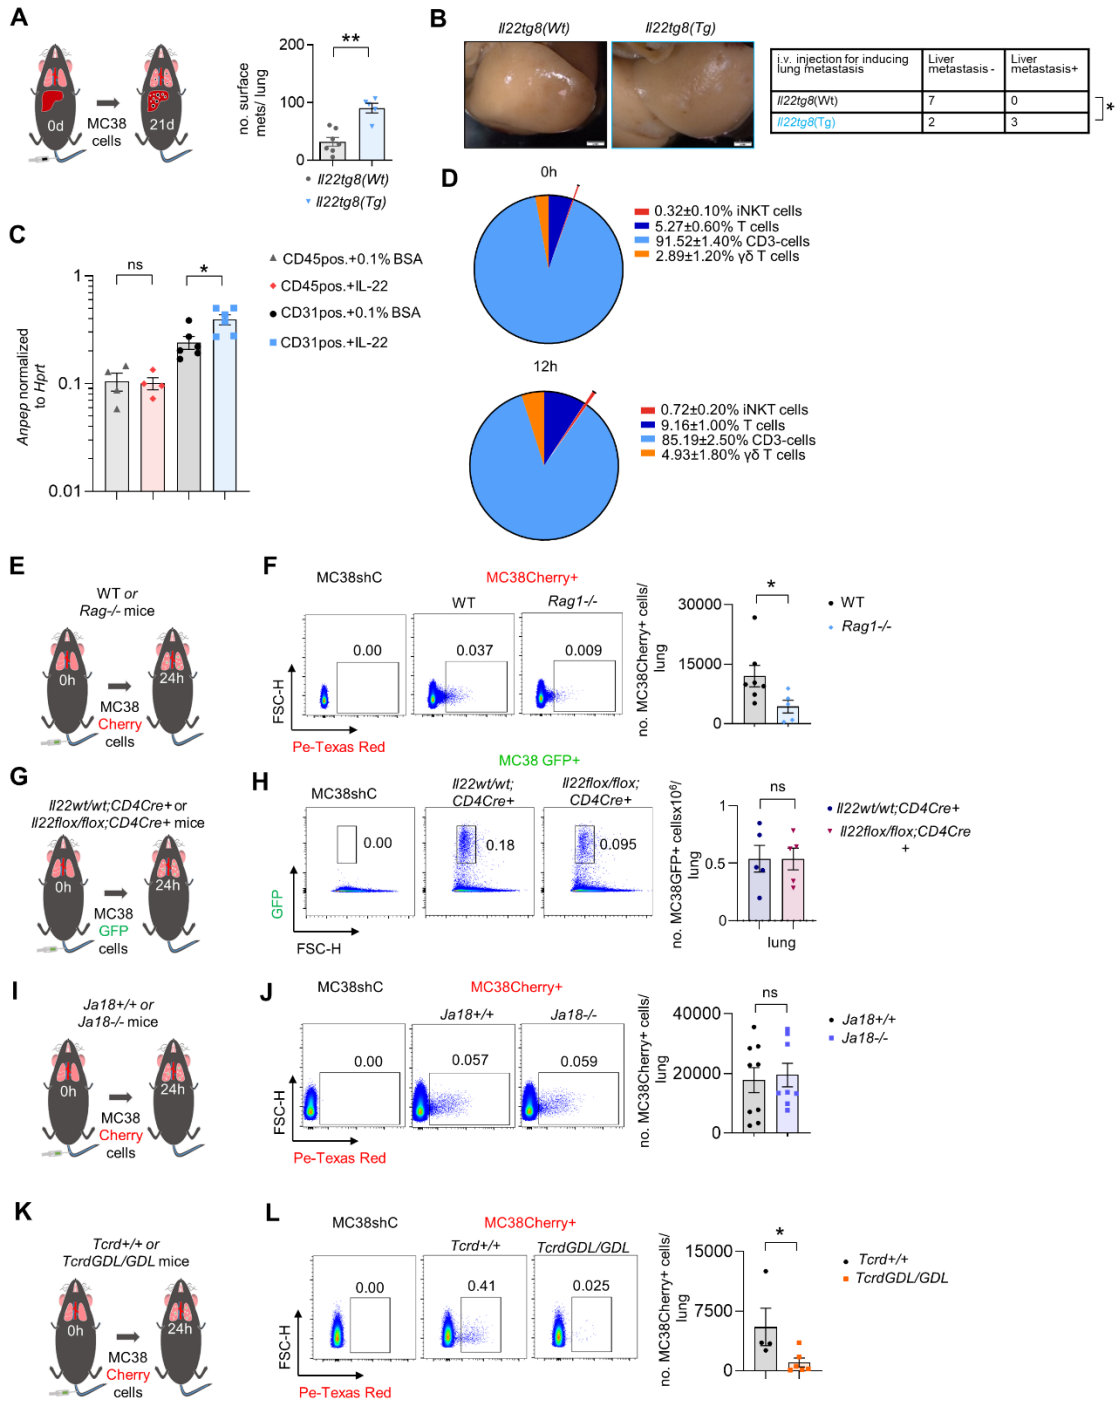

**Figure S5, related to Figure 5. IL-22 producing  $\gamma\delta$  T cells affect cancer cell extravasation into the lung via ANPEP induction**

(A) Schematic overview of intravenous injection of MC38 cells for forced lung metastasis induction and number of macroscopic metastases in total lungs of mice with normal (*Il22tg8<sup>(Wt)</sup>*) or high (*Il22tg8<sup>(Tg)</sup>*) levels of IL-22.  $n \geq 5$  mice per group. (B) Representative pictures and percentage of mice with normal (*Il22tg8<sup>(Wt)</sup>*) or high (*Il22tg8<sup>(Tg)</sup>*) levels of IL-22 which develop macroscopic liver metastases.  $n \geq 5$  mice per group. (C) *Anpep* expression of sorted CD45+ and CD31+ cells upon stimulation with rmlL-22 (100 ng/ $\mu$ l). (D) Diagram showing the proportion of different immune subtypes of CD45+IL-22+ cells in murine lung 0 and 12 hours upon intravenous injection of MC38 cells. (E) Schematic overview of intravenous injection of MC38 Cherry-labelled cells in WT and *Rag1<sup>-/-</sup>* mice. (F) Representative FACS plots and statistics of MC38 Cherry-labelled extravasated cells in Wt and *Rag1<sup>-/-</sup>* mice.  $n \geq 4$  mice per group. (G) Schematic overview of intravenous injection of MC38 GFP-labelled cells in *Il22<sup>wt/wt</sup>;CD4<sup>Cre+</sup>* and *Il22<sup>fllox/fllox</sup>;CD4<sup>Cre+</sup>* mice (extravasation assay).  $n \geq 5$  mice per group. (H) Representative FACS plots and number of extravasated cancer cells from *Il22<sup>wt/wt</sup>;CD4<sup>Cre+</sup>* and *Il22<sup>fllox/fllox</sup>;CD4<sup>Cre+</sup>* mice 24h post intravenous injection.  $n \geq 4$  mice per group (I) Schematic overview of intravenous injection of MC38 Cherry-labelled cells in *Ja18<sup>+/+</sup>* and *Ja18<sup>-/-</sup>* mice.  $n \geq 8$  mice per group. (J) Representative FACS plots and number of extravasated cancer cells from *Ja18<sup>+/+</sup>* or *Ja18<sup>-/-</sup>* mice 24h post intravenous injection. Mice were sacrificed and the number of extravasated cancer cells in the lungs was quantified. (K) Schematic overview of intravenous injection of MC38 Cherry-labelled cells in *Tcrd<sup>GDL/GDL</sup>* and *Tcrd<sup>+/+</sup>* mice following DT (Diphtheria toxin) injection (DT injection in *Tcrd<sup>GDL/GDL</sup>* mice leads to  $\gamma\delta$  T cell depletion).  $n \geq 4$  mice per group. (L) Representative FACS plots and number of extravasated cancer cells from *Tcrd<sup>GDL/GDL</sup>* or *Tcrd<sup>+/+</sup>* mice 24h post intravenous injection. Mice were sacrificed and the number of extravasated cancer cells in the lungs were quantified. Data presented as mean  $\pm$  SEM. ns>0.05; \*:p<0.05; \*\*:p $\leq$ 0.01; \*\*\*:p $\leq$ 0.001 as assessed by Mann-Whitney U test (C, F, H, J and L) or Fischer's exact test (B).

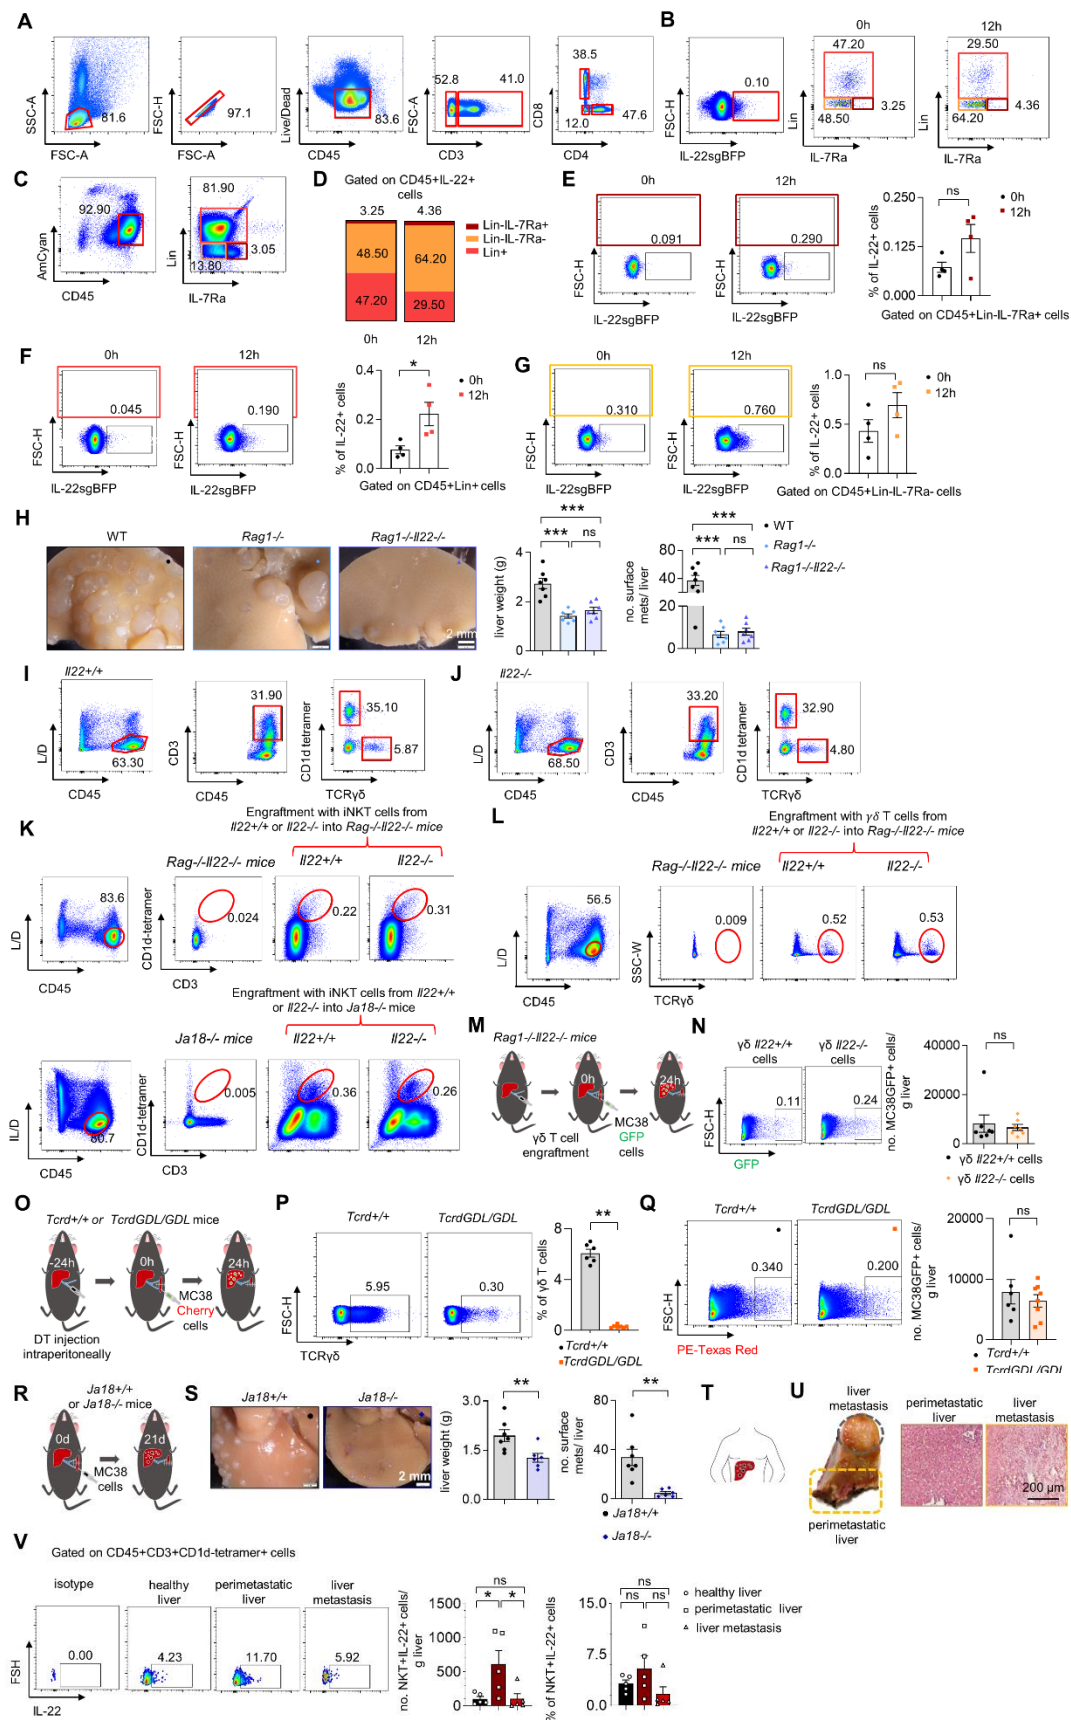

**Figure S6, related to Figure 6. IL-22 producing iNKT cells, but not T,  $\gamma\delta$  T and Lin- cells, affect cancer cell extravasation into the liver parenchyma** (A) Gating strategy used to assess the IL-22 expression in different immune subtypes upon intrasplenic injection of MC38 cells. (B) Gating strategy used to assess the Lin-IL-7Ra+IL-22+, Lin-IL-7Ra-IL-22+ and Lin+IL-22+ cells isolated from murine liver 0 and 12h upon intrasplenic injection of MC38 cells. (C) Gating strategy used to assess the Lin-IL-7Ra+, Lin-IL-7Ra- and Lin+ cells isolated from murine liver 0 and 12h after intrasplenic injection of MC38 cells. (D) Diagram showing the proportion of different subtypes of CD45+IL-22+ cells in murine liver 0 and 12h after intrasplenic injection of MC38 cells. (E, F, G) FACS plots showing the production of IL-22 in the Lin-IL-7Ra+, Lin-IL-7Ra- and Lin+ cells isolated from murine liver 0 and 12h after intrasplenic injection of MC38 cells.  $n \geq 4$  mice per group. (H) Liver weight and number of macroscopic liver metastases post intrasplenic injection of MC38 cells in WT, *Rag1*<sup>-/-</sup> and *Rag1*<sup>-/-</sup>;*Il22*<sup>-/-</sup> mice.  $n \geq 6$  mice per group. (I, J) FACS plots showing the gating strategy used for the sorting of iNKT and  $\gamma\delta$  T cells from *Il22*<sup>+/+</sup> and *Il22*<sup>-/-</sup> mice. (K) Engraftment with iNKT cells (total population) from *Il22*<sup>+/+</sup> or *Il22*<sup>-/-</sup> into *Rag1*<sup>-/-</sup> and *Ja18*<sup>-/-</sup> mice. (L) Engraftment with  $\gamma\delta$  T cells from *Il22*<sup>+/+</sup> into *Rag1*<sup>-/-</sup>*Il22*<sup>-/-</sup> mice. (M) Schematic overview of intrasplenic injection of MC38 GFP-labelled cells in *Rag1*<sup>-/-</sup>*Il22*<sup>-/-</sup> mice engrafted with *Il22*<sup>+/+</sup> or *Il22*<sup>-/-</sup>  $\gamma\delta$  T cells (extravasation assay). (N) Representative FACS plots and number of extravasated cancer cells from *Rag1*<sup>-/-</sup>*Il22*<sup>-/-</sup> mice engrafted with *Il22*<sup>+/+</sup> or *Il22*<sup>-/-</sup>  $\gamma\delta$  T cells 24h postintrasplenic injection.  $n \geq 7$  mice per group. (O) Schematic overview of intrasplenic injection of MC38 GFP-labelled cells in *Tcrd*<sup>GDL/GDL</sup> and *Tcrd*<sup>+/+</sup> mice following DT (Diphtheria toxin) injection (DT injection in *Tcrd*<sup>GDL/GDL</sup> mice leads to  $\gamma\delta$  T cell depletion).  $n \geq 7$  mice per group. (P) Representative FACS plots and quantification of  $\gamma\delta$  T cells of *Tcrd*<sup>GDL/GDL</sup> and *Tcrd*<sup>+/+</sup> mice upon DT injection. (Q) Representative FACS plots and number of extravasated cancer cells from *Tcrd*<sup>GDL/GDL</sup> or *Tcrd*<sup>+/+</sup> mice 24h post intrasplenic injection. (R) Schematic overview of intrasplenic injection of MC38 cells for forced liver metastasis induction in *Ja18*<sup>+/+</sup> and *Ja18*<sup>-/-</sup> mice. (S) Representative pictures, number of macroscopic metastases in total liver and liver weight of *Ja18*<sup>+/+</sup> mice compared to *Ja18*<sup>-/-</sup> mice.  $n \geq 6$  mice per group. (T) Schematic overview of human liver metastasis. (U) Fresh specimen from resected liver metastasis and hematoxylin & eosin staining of perimetastatic and metastatic human liver. (V) Flow cytometry of perimetastatic and metastatic human liver and diagram showing the proportion of iNKT IL-22-producing cells in perimetastatic and metastatic human liver. Cells were isolated from fresh perimetastatic and metastatic liver tissue and analyzed using flow cytometry.  $n = 5$  patients. Scale bar: 200 $\mu$ m. Data presented as mean  $\pm$  SEM. ns>0.05; \*:p<0.05; \*\*:p $\leq$ 0.01; \*\*\*:p $\leq$ 0.001 as assessed by one-way ANOVA with Bonferroni post hoc tests (H, V) or Mann-Whitney U test (E, F, G, N, P, Q, S).

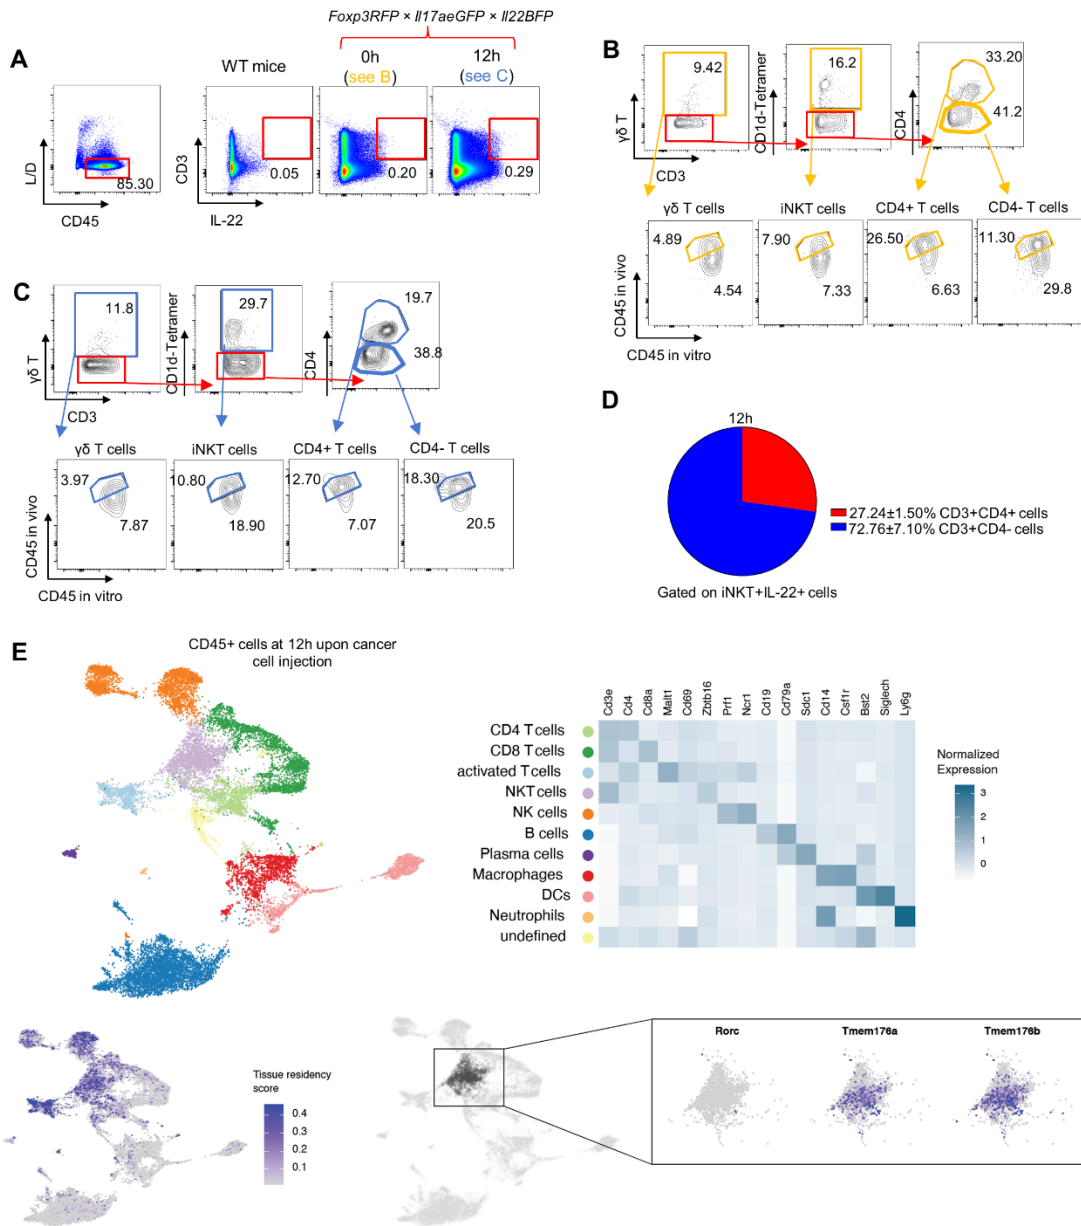

**Figure S7, related to Figure 7. IL-22 producing iNKT17 cells express tissue resident markers** (A-C) Gating strategy used for Figure 7 C. (A) FACS plots showing the IL-22+ T cell populations in the livers of *Foxp3<sup>RFP</sup>;Il17a<sup>eGFP</sup>;Il22<sup>BFP</sup>* mice 0h and 12h post MC38 cell injection compared to WT mice. (B,C) Representative FACS plots of the indicated fractions within the IL-22+ T cell population showing the percentage of infiltrating and circulating cells at 0h (B) and 12h (C). (D) The contribution of CD4+ and CD4- of iNKT+IL-22+ cells 12 hours upon intrasplenic cancer cell injection. (E) Cell clusters of identified CD45+ cells using single-cell sequencing in mouse livers 12 hours upon intrasplenic cancer cell injection, overlaid with tissue residency score and iNKT17 markers.



**Supplementary table 1, related to the STAR method section: Taqman probes and primer sequences utilized for this study**

| gene                               | company           | taqman probe/<br>primer name | sequence (5' → 3')                |
|------------------------------------|-------------------|------------------------------|-----------------------------------|
| <i>Il22<sup>-/-</sup></i>          | Eurofins Genomics | IL22SU                       | TCA TCT GCT TGG TAC CAT GC        |
|                                    |                   | IL22dRev                     | CAG AGA AAA TGG CAA GGC GG        |
|                                    |                   | LacZ                         | GTC TGT CCT AGC TTC CTC ACT G     |
| <i>CD4Cre<sup>+</sup></i>          | Eurofins Genomics | CD4Cre Mu                    | TTA GGG TGG GGC TCA GAA GG        |
|                                    |                   | CD4Cre Co                    | AAC TTG CAC AGC TCA GAA TGC       |
|                                    |                   | CD4Cre Wt                    | ACC TGA GAT TCC ACC AAA CTT GA    |
| <i>Il10GFP</i>                     | Eurofins Genomics | GFP-3                        | AAG TCG TGC TGC TTC ATG TG        |
|                                    |                   | GFP-5                        | ACG TAA ACG GCC ACA AGT TC        |
|                                    |                   | IL10KOF                      | GTG TGT ATT GAG TCT GCT GGA C     |
|                                    |                   | IL10KOR1                     | GTG TGG CCA GCC TTA GAA TAG       |
|                                    |                   | IL10KOR2                     | GGT TGC CTT GAC CAT CGA TG        |
| <i>Foxp3RFP</i>                    | Eurofins Genomics | FIR1                         | CAA AAC CAA GAA AAG GTG GGC       |
|                                    |                   | FIR2                         | GGA ATG CTC GTC AAG AAG ACA GG    |
|                                    |                   | FIR3                         | CAT CTT GGA GAG TCG GTG TG        |
| <i>Il22ra1<sup>-/-</sup></i>       | Eurofins Genomics | CAS_R1_Term                  | TCG TGG TAT CGT TAT GCG CC        |
|                                    |                   | IL22ra1_F                    | TCT GAT GCC CTC TTC TGC TG        |
|                                    |                   | IL22ra1_R                    | TTG CTG GTC ACA GTC CAT CC        |
| <i>Il17Cre<sup>+</sup></i>         | Eurofins Genomics | 17AyfpF                      | CAA GTG CAC CCA GCA CCA GCT GAT C |
|                                    |                   | 17AyfpRwt                    | CTT AGT GGG TTA GTT TCA TCA CAG C |
|                                    |                   | 17AyfpCreR                   | GCA GCA GGG TGT AGG CAA TGC       |
| <i>Il22ra1<sup>flox/flox</sup></i> | Eurofins Genomics | IL22ra1_wt_R1                | TGG GTC GGT TTG CAG ACT TG        |
|                                    |                   | IL22ra1_wt_F1                | GCC CTC TTC TGC TGT GTC TGA       |
| <i>Il22<sup>flox/flox</sup></i>    | Eurofins Genomics | DNA460-40                    | CTC AGA CCT CTA CAG ACA ATC ATC   |
|                                    |                   | DNA460-22                    | CAG CTG GCG GCC AAA GTC CC        |
| <i>AlbCre<sup>+</sup></i>          | Eurofins Genomics | CreIA                        | GCA CTG ATT TCG ACC AGG TT        |
|                                    |                   | CreIIB                       | CCC GGC AAA ACA GGT AGT TA        |
| <i>Cdh5Cre<sup>+</sup></i>         | Eurofins Genomics | Cdh5-Cre Fw                  | GTC CAA TTT ACT GAC CGT ACA C     |
|                                    |                   | Cdh5-Cre Rev                 | CTG TCA CTT GGT CGT GGC AGC       |
| <i>Rosa26<sup>YFP+</sup></i>       | Eurofins Genomics | Rosa26 Seq1                  | AAA GTC GCT CTG AGT TGT TAT       |
|                                    |                   | Rosa26 Seq2                  | GCG AAG AGT TTG TCC TCA ACC       |
|                                    |                   | Rosa26 Seq3                  | GGA GCG GGA GAA ATG GAT ATG       |
| <i>Il17aeGFP</i>                   | Eurofins Genomics | IL-17A KI sense              | CAC CAG CGC TGT GTC AAT           |
|                                    |                   | IL-17A KI anti sense         | ACA AAC ACG AAG CAG TTT GG        |
|                                    |                   | IL-17A KI IRES               | ACC GGC CTT ATT CCA AGC           |
| <i>Il22BFP</i>                     | Eurofins Genomics | TailWT22F                    | GTG CTC AGC AAG CAA ATG TC        |
|                                    |                   | SiresF1                      | TAC GCT TGA GGA GAG CCA           |
|                                    |                   | SHAGF                        | AAT GAT GGA CGT TAG CTT           |
|                                    |                   | SHAGR                        | CCC GAC CAC ATG GGT TGA A         |
| <i>Apc15lox</i>                    | Eurofins Genomics | int14loxF                    | AGG GTT ATT GAA TAT GAT CGG       |
|                                    |                   | mInt14Apc-R4                 | AGC AGC AAA CTT ACT TTA CAG       |
|                                    |                   | m14intApc-F3                 | AAC TTC TGA GTA TGA TGG AGG       |
|                                    | Eurofins Genomics | Kras22908                    | CTG CAT AGT ACG CTA TAC CCT GT    |

|                               |                          |                      |                                                 |
|-------------------------------|--------------------------|----------------------|-------------------------------------------------|
| <i>KrasG12D</i>               |                          | Kras22907            | TGT CTT TCC CCA GCA CAG T                       |
|                               |                          | oIMR9592             | GCA GGT CGA GGG ACC TAA TA                      |
| <i>Il22tg8<sup>(Tg)</sup></i> |                          | Il22SV40_TG6/8       | CCC ATT CAT CAG TTC CAT AG                      |
|                               |                          | Il22CDNA_TG6/8       | GAG TGG AGA GAG ATC AAG GCG ATT G               |
| <i>Il17aPe-Cy5</i>            | Eurofins Genomics        | IL-17A KI sense      | CAC CAG CGC TGT GTC AAT                         |
|                               |                          | IL-17A KI anti sense | ACA AAC ACG AAG CAG TTT GG                      |
|                               |                          | IL-17A KI IRES       | ACC GGC CTT ATT CCA AGC                         |
| <i>Rosa26 YFP</i>             | Eurofins Genomics        | Rosa26 Seq1          | AAA GTC GCT CTG AGT TGT TAT                     |
|                               |                          | Rosa26 Seq2          | GCG AAG AGT TTG TCC TCA ACC                     |
|                               |                          | Rosa26 Seq3          | GGA GCG GGA GAA ATG GAT ATG                     |
| <i>Cd13<sup>-/-</sup></i>     | Eurofins Genomics        | CD13KO Forward       | CAC CCC CAT CCC CCA TCC CTT AC                  |
|                               |                          | CD13KO Reverse       | GTG CCC ACG CCC TTG AAC CTT ACT T               |
|                               |                          | CD13KO IRESrev       | ACAAACGCACACCGGCCTTATTCC                        |
| <i>Rag1<sup>-/-</sup></i>     | Eurofins Genomics        | RagWF                | GAG GTT CCG CTA CGA CTC TG                      |
|                               |                          | RagR                 | CCG GAC AAG TTT TTC ATC GT                      |
|                               |                          | RagMF                | TGG ATG TGG AAT GTG TGC GAG                     |
| <i>Ja18<sup>-/-</sup></i>     | Eurofins Genomics        | Ja18 Com             | CTC AAA AGG CTG TGT AAT TGC T                   |
|                               |                          | Ja18 Mut             | CTT GGG GAT GTT TAC AGA GTA CC                  |
|                               |                          | Ja18 WT              | AGT CCC AGC TCC AAA ATG C                       |
| <i>TcrdGDL/GDL</i>            | Eurofins Genomics        | Delta FW             | CTAGAAGAAAAGCAAAAGCCCTC                         |
|                               |                          | Delta REV            | CCTTCCTTTTCGGTATTTTACTTTCA                      |
|                               |                          | IRES REV             | AAACGCACACCGGCCTTATT                            |
| <i>Il22 cloning primer A</i>  | Eurofins Genomics        | IL22 FW              | ATG GCT GTC CTG CAG AAA TCT                     |
|                               |                          | IL22 REV             | TCA GAC GCA AGC ATT TCT CAG                     |
| <i>Il22 cloning primer B</i>  | Eurofins Genomics        | m_BglII_IL22         | TCC GGA CTC AGA TCT ATG GCT GTC CTG CAG AAA TCT |
|                               |                          | m_EcoRI_IL22         | TCG ACT GCA GAA TTC TCA GAC GCA AGC ATT TCT CAG |
| <i>Il22</i>                   | Thermo Fisher Scientific | Mm01226722_g1        |                                                 |
| <i>Hprt</i>                   | Thermo Fisher Scientific | Mm03024075_m1        |                                                 |
| <i>Anpep</i>                  | Thermo Fisher Scientific | Mm00476227_m1        |                                                 |
| <i>Fgfr3</i>                  | Thermo Fisher Scientific | Mm00433294_m1        |                                                 |
| <i>Epas1</i>                  | Thermo Fisher Scientific | Mm00433294_m1        |                                                 |
| <i>Cdh5</i>                   | Thermo Fisher Scientific | Mm00486938_m1        |                                                 |
| <i>Cxcl12</i>                 | Thermo Fisher Scientific | Mm00445553_m1        |                                                 |
| <i>Nrp1</i>                   | Thermo Fisher Scientific | Mm00435379_m1        |                                                 |
| <i>Angpt1</i>                 | Thermo Fisher Scientific | Mm00456503_m1        |                                                 |
| <i>Plg</i>                    | Thermo Fisher Scientific | Mm00447087_m1        |                                                 |
| <i>Cxcl16</i>                 | Thermo Fisher Scientific | Mm00469712_m1        |                                                 |
| <i>Vegfa</i>                  | Thermo Fisher Scientific | Mm00437306_m1        |                                                 |

**Supplementary table 2, related to STAR method section: Cloning oligonucleotide sequences corresponding to shRNA and sgRNAs used in this study**

| <b>Vector Backbone</b> | <b>Sigma mission #</b> | <b>Target of shRNA</b>    |
|------------------------|------------------------|---------------------------|
| pLKO.1-puro            | SHC002                 | scrambled                 |
| pLKO.1-puro            | TRCN0000050238         | human <i>ANPEP</i> (CD13) |
| pLKO.1-puro            | TRCN0000050239         | human <i>ANPEP</i> (CD13) |
| pLKO.1-puro            | TRCN0000050240         | human <i>ANPEP</i> (CD13) |
| pLKO.1-puro            | TRCN0000018482         | human <i>ANPEP</i> (CD13) |
| pLKO.1-puro            | TRCN0000025830         | human <i>ANPEP</i> (CD13) |
| pLKO.1-puro            | TRCN0000035991         | human <i>ANPEP</i> (CD13) |
| pLKO.1-puro            | TRCN0000065863         | Mouse <i>Il22ra1</i>      |
| pLKO.1-puro            | TRCN0000065864         | Mouse <i>Il22ra1</i>      |
| pLKO.1-puro            | TRCN0000065865         | Mouse <i>Il22ra1</i>      |
| pLKO.1-puro            | TRCN0000065866         | Mouse <i>Il22ra1</i>      |
| pLKO.1-puro            | TRCN0000065867         | Mouse <i>Il22ra1</i>      |
